# Supplementary material for: Higher yield sustainability and soil quality by reducing chemical fertilizer with organic fertilizer application under a single-cotton cropping system
Source: Front Plant Sci. 2024 Nov 14;15:1494667. doi: 10.3389/fpls.2024.1494667 (PMC11602747; doi:10.3389/fpls.2024.1494667)
Supplement: Supplementary file 2 [file Table1.xlsx]

## Sheet: soil
		soil bulk density	pH	soil organic matter	soil total nitrogen	soil ammonium nitrogen	soil nitrate nitrogen	soil alkali-hydrolyzable nitrogen	soil available phosphorus	soil available potassium
CK	CK1	1.35	6.92	9.87	0.69	5.54	8.29	42.13	5.41	63.3
	CK2	1.54	7.18	10.4	0.75	5.56	8.04	44.11	5.43	56.35
	CK3	1.47	7.12	9.6	0.76	5.45	8.16	41.64	5	61.41
	CK4	1.24	6.88	10.48	0.73	5.48	8.01	41.51	4.99	59.77
	CK5	1.28	7.11	10.66	0.79	5.62	8.11	44.32	5.42	60.88
	CK6	1.23	7.05	10.24	0.73	5.43	8.46	44	5.19	60.1
CF	CF1	1.49	6.31	12.14	1.27	11.45	25.52	70.58	18.46	89.61
	CF2	1.44	6.61	12.45	1.31	11.35	25.99	66.49	18.29	88.1
	CF3	1.59	6.84	12.82	1.29	11.46	25.25	70.49	17.74	89.49
	CF4	1.48	6.09	12.55	1.21	11.37	24.9	62.28	18.32	90.63
	CF5	1.42	6.41	12.93	1.32	11.36	25.01	68.56	18.19	89.23
	CF6	1.48	6.23	13.09	1.21	11.37	25.26	65.62	17.74	92.02
M1	M1	1.47	6.79	20.34	1.71	14.15	15.5	77.93	28.66	123.6
	M2	1.21	6.58	20.43	1.73	14.06	15.24	79.31	29.87	123.02
	M3	1.28	6.67	20.44	1.74	14.09	15.43	82.41	28.39	119.46
	M4	1.31	6.51	20.11	1.63	14.15	15.13	82.19	31.34	124.16
	M5	1.26	6.58	20.05	1.66	14.09	14.8	77.65	27.4	126.15
	M6	1.26	6.64	20.86	1.71	14.26	15.13	80.72	28.93	124.59
M2	M21	1.24	6.98	18.21	1.55	13.56	18.1	73.43	26.67	108.72
	M22	1.34	7.23	17.62	1.54	13.51	16.79	75.99	26.41	109.39
	M23	1.43	7.18	18.16	1.55	13.57	17.04	78.65	26.09	109.92
	M24	1.36	7.11	17.35	1.5	13.61	18.07	75.03	27.57	109.88
	M25	1.35	7.12	17.63	1.52	13.59	16.57	76.84	26.62	103.86
	M26	1.26	7.23	17.41	1.48	13.62	17.61	73.31	27.98	108.16
M3	M31	1.24	7.39	16.61	1.45	12.46	22.23	75.53	24.98	92.43
	M32	1.2	7.54	14.22	1.43	12.44	23.14	74.76	23.39	92.22
	M33	1.2	7.31	15.51	1.45	12.49	22.64	76.44	23.15	89.4
	M34	1.21	7.18	14.82	1.43	12.48	22.87	76.97	25.88	95.52
	M35	1.22	7.11	14.43	1.38	12.47	22.8	73.03	26.45	91.66
	M36	1.23	7.25	15.49	1.33	12.46	21.92	75.02	21.55	91.89

## Sheet: enzyme
		Urease	Catalase	Alkaline phosphatase
CK	CK1	0.16	19.61	1.73
	CK2	0.18	20.53	1.16
	CK3	0.19	21.34	1.16
	CK4	0.23	20.67	1.07
	CK5	0.2	21.55	1.27
	CK6	0.15	21.14	1.61
CF	CF1	0.19	21.49	1.89
	CF2	0.17	22.21	1.69
	CF3	0.17	23.38	1.55
	CF4	0.18	21.94	1.86
	CF5	0.17	20.29	1.76
	CF6	0.19	23.39	1.97
M1	M1	0.37	34.91	1.86
	M2	0.38	33.56	1.61
	M3	0.37	32.04	2.03
	M4	0.36	36.19	2.14
	M5	0.36	32.73	1.88
	M6	0.38	32.89	2.05
M2	M21	0.32	31.59	2.1
	M22	0.35	33.66	1.73
	M23	0.32	29.79	2.06
	M24	0.3	29.78	2.02
	M25	0.29	28.11	1.83
	M26	0.32	28.86	2.07
M3	M31	0.25	29.69	2.02
	M32	0.26	29.87	1.79
	M33	0.22	30.14	1.23
	M34	0.25	30.72	1.24
	M35	0.26	30.72	1.92
	M36	0.23	30.67	2.01

## Sheet: yield
		2014	2015	2016	2017	2018	2019	2020	2021	2022	2023
CK	CK1	2736.3	2536.9	2416.4	2213.4	2012.3	1937.1	1867.3	1678.4	1648.2	1533.8
	CK2	2745.3	2541.9	2426.4	2218.4	2017.3	1942.1	1872.3	1683.4	1653.2	1538.8
	CK3	2746.3	2550.9	2426.4	2223.4	2024.3	1948.1	1877.3	1685.4	1660.2	1540.8
	CK4	2733.3	2533.9	2413.4	2212.4	2009.3	1934.1	1863.3	1675.4	1645.2	1530.8
	CK5	2730.3	2530.9	2410.4	2207.4	2006.3	1931.1	1861.3	1672.4	1642.2	1527.8
	CK6	2742.3	2542.9	2422.4	2219.4	2018.3	1943.1	1873.3	1684.4	1654.2	1539.8
CF	CF1	4576.9	4367.1	4022.8	4462.8	4217.5	3617.5	4322.3	4127.8	3834.3	4055.6
	CF2	4587.9	4377.1	4035.8	4476.8	4227.5	3627.5	4332.3	4137.8	3844.3	4065.6
	CF3	4591.9	4387.1	4037.8	4477.8	4232.5	3632.5	4337.3	4145.8	3849.3	4070.6
	CF4	4582.9	4373.1	4028.8	4468.8	4228.5	3625.5	4328.3	4133.8	3845.3	4061.6
	CF5	4568.9	4359.1	4014.8	4454.8	4209.5	3609.5	4316.3	4119.8	3826.3	4050.6
	CF6	4563.9	4354.1	4009.8	4449.8	4204.5	3604.5	4309.3	4114.8	3821.3	4042.6
M1	M1	4416.2	4225.8	4045.8	4512.7	4614.8	3922.5	4678.2	4526.1	4376.4	4527.3
	M2	4424.2	4230.8	4050.8	4517.7	4619.8	3927.5	4683.2	4531.1	4381.4	4532.3
	M3	4431.2	4240.8	4060.8	4527.7	4626.8	3937.5	4693.2	4541.1	4391.4	4542.3
	M4	4432.2	4245.8	4061.8	4528.7	4630.8	3940.5	4694.2	4542.1	4395.4	4543.3
	M5	4408.2	4217.8	4040.8	4508.7	4606.8	3914.5	4675.2	4518.1	4368.4	4523.3
	M6	4413.2	4222.8	4042.8	4509.7	4611.8	3919.5	4675.2	4528.1	4373.4	4524.3
M2	M21	4206.4	4014.5	3917.5	4376.9	4322.5	3716.9	4427.5	4367.8	4278.5	4321.6
	M22	4215.4	4025.5	3926.5	4382.9	4328.5	3722.9	4433.5	4380.8	4284.5	4327.6
	M23	4214.4	4022.5	3925.5	4384.9	4336.5	3720.9	4435.5	4375.8	4280.5	4330.6
	M24	4219.4	4027.5	3930.5	4392.9	4335.5	3729.9	4438.5	4380.8	4291.5	4334.6
	M25	4215.4	4023.5	3926.5	4385.9	4331.5	3725.9	4436.5	4376.8	4287.5	4330.6
	M26	4200.4	4008.5	3911.5	4370.9	4316.5	3710.9	4421.5	4361.8	4272.5	4315.6
M3	M31	3927.5	3745.2	3717.9	4226.8	4127.2	3537.2	4378.3	4238.2	4164.5	4176.7
	M32	3935.5	3753.2	3725.9	4234.8	4135.2	3545.2	4386.3	4246.2	4172.5	4184.7
	M33	3941.5	3759.2	3731.9	4240.8	4141.2	3551.2	4392.3	4254.2	4178.5	4186.7
	M34	3927.5	3739.2	3718.9	4224.8	4126.2	3535.2	4375.3	4232.2	4158.5	4170.7
	M35	3942.5	3755.2	3732.9	4241.8	4142.2	3552.2	4393.3	4253.2	4172.5	4191.7
	M36	3925.5	3743.2	3715.9	4224.8	4125.2	3535.2	4376.3	4236.2	4162.5	4174.7
